# Supplementary material for: PhenoSV: interpretable phenotype-aware model for the prioritization of genes affected by structural variants
Source: PubMed Central journal article supplement (PMC10684511; doi:10.1038/s41467-023-43651-y), 2023-11-28
Supplement: 41467_2023_43651_MOESM3_ESM.pdf [file 41467_2023_43651_MOESM3_ESM.pdf]

## **Description of Additional Supplementary Files:**

**Supplementary Data 1:** Genomic features used to annotate SVs

**Supplementary Data 2:** Summary of datasets used in the study
